# Supplementary material
Source: PubMed Central journal article supplement (PMC4675960)
Supplement: NIHMS739017-supplement-supplemental_appendix.pdf [file NIHMS739017-supplement-supplemental_appendix.pdf]

## Appendix

- 1. Model Description**
- 2. Table 1: Country Data**
- 3. Figure 1: Model Diagram**
- 4. Table 2: Base Case Model Results by Country**
- 5. Table 3: Probability and Cost Input Tables**

### 1. Detailed Model Description

#### Model Overview

We constructed a decision-analytic model with a Markov specification, using TreeAge Pro suite 2009 (TreeAge Software, Inc, Williamstown, Massachusetts) decision tree software, designed to capture the recurring nature of suspected malaria fevers. Total costs and deaths averted, based on the course of disease and treatment over the year, are aggregated. We use two-stage micro-simulation to address model uncertainty. For illustration, we describe the mRDT arm in Figure 1 below. The PT arm has a parallel structure with testing omitted.

We begin with a hypothetical cohort of 1000 children, and based on prevalence, children begin in either a fever or no-fever state. Transmission rates and treatment paths determine how children cycle for 365 days between three states: fever, no fever and death, upon which they exit the cohort. The initial node “M” represents the Markov cycling specification. Note, events along the pathways, such as care-seeking, are driven by probabilities and referred to as chance nodes, represented by circles in the Figure 1.

When a fever occurs, a proportion of caregivers will seek care for children; others will not. If care is sought, children will receive the mRDT, producing a positive or negative result. If

the test is positive, a portion of clinicians will act on the positive result and prescribe artemisinin-based combination therapy (ACT); the remainder will ignore the result and prescribe antibiotics. If the test is negative, a portion of clinicians will act on the negative result and prescribe antibiotics; the remainder will ignore the result and prescribe ACT.

Based on test sensitivity and specificity, only some tests results will be accurate. These factors and clinician response produce eight patient groups, only a subset of which have been correctly diagnosed and are receiving the appropriate treatment. They are shown in boxed branch of Figure 1. For example, the lower branch shows the path where treatment has been sought, the mRDT is negative, the clinician prescribes an ACT and non-malaria fever is present. This is a very poor outcome as the child receives inappropriate treatment, unnecessary drug use occurs, and testing resources are wasted.

As shown in the box in Figure 1, the model has eight test/adherence pathways for children receiving formal care: 1) mRDT is positive, the clinician adheres to the test result, child has malaria, and the clinician prescribes ACT; 2) mRDT is positive, the clinician adheres to the test result, child has non-malaria fever, and the clinician prescribes ACT; 3) mRDT is positive, the clinician does not adhere to the test result, child has malaria, and the clinician prescribes antibiotics; 4) mRDT is positive, the clinician does not adhere to the test result, child has non-malaria fever, and the clinician prescribes antibiotics.

Given that the mRDT can also be negative, four additional pathways exist: 5) mRDT is negative, the clinician adheres to the test result, child has non-malaria fever, and the clinician prescribes antibiotics; 6) mRDT is negative, the clinician adheres to the test result, child has malaria, and the clinician prescribes antibiotics; 7) mRDT is negative, the clinician does not adhere to the test result, child has non-malaria fever, and the clinician prescribes ACT; 8) mRDT is

negative, the clinician does not adhere to the test result, child has malaria, and the clinician prescribes ACT.

As shown in the second slide in Figure 1, the top branch traces the treatment pathway for the patient subset who test positive, are true cases and are given ACT. For this group a portion will recover immediately and survive. They will then face a second exposure period and “jump” to the beginning of the model, the initial Markov node.

Others will experience some benefit, then relapse. These “treatment failures” will seek care a second time, some at a hospital or others at a health facility, depending on local infrastructure. At the hospital those with uncomplicated malaria will be referred to outpatient care for treatment and will fully recover. Those with severe malaria will either be admitted or not, depending on factors, such as bed availability, and then will either survive or die, depending on admission status.

Those who present at a health care facility with uncomplicated illness, will receive outpatient care and survive. Those with severe malaria will be referred to a hospital, with a portion receiving a pre-referral test. They will follow the hospital pathway described above and will subsequently survive or die, depending on admission status.

Alternatively, caregivers may not seek care for a given fever episode. For some of these children, their disease may remain uncomplicated, whereby they survive. For the remainder, their disease progresses and they will either die or survive. This group incurs no formal treatment costs.

At the end of the fever episode, all children will have either died and exited the cohort or survived. Based on the likelihood of transmission, survivors will return to the Markov node

and face another exposure period of fever/no fever. The pathway described above for the group with a positive mRDT, who have malaria and who are given ACT is repeated for the other seven groups. The PT arm follows a similar structure with no testing.

### *Model Uncertainty*

The model is a pathway of probabilistic events and we use two stage microsimulation to address inherent uncertainty. A key input driving annual cost and deaths averted is the number of possible fevers per child as each fever involves a likelihood of incurring costs and death. To address this issue, we specify two variables in the model. One is the length of the exposure period during which a child can have a fever or not or die, and the other is fever duration, should a fever occur. They are drawn from independent distributions. They are equal at their maximums as the duration of a fever cannot exceed the exposure period. Estimates of maximum fever duration range from 14 days to 30 days. The average number of annual fevers per child in sub-Saharan Africa is six.

In the first order simulation, at the beginning of exposure period, the model draws a random number from 14 to 30 days to determine the exposure period length. Then, should a fever occur, fever duration is randomly assigned. For example, an uncomplicated fever with successful treatment lasts two days on average, while an uncomplicated case, requiring a second treatment, lasts nine days on average. If no fever occurs, then a child faces the risk of infection at the beginning of the next exposure period.

Based on 1000 iterations at base case values, we generate a cohort of 1000 individual profiles of fever/no-fever/death episodes for one year which is used in the second estimation stage.

Model uncertainty also comes from the probability and cost input which we address through probabilistic sensitivity analysis. First we identify the inputs generating 99% of the uncertainty in the model through one-way sensitivity analysis. For this variable group we assume that each represents a value drawn from a triangular distribution, an unrestrictive form which maximizes the impact of uncertainty. Using the cohort generated from stage one, we run a second-stage simulation where input values are randomly selected from their distributions for each run of 10,000 iterations. This second stage provides estimates of mean and standard error values for costs and deaths associated with mRDT and PT.



**Table 1: Population, Income, and Base Values of Primary Model Inputs by Country**

| Country                                                                         | Angola       | Tanzania   | Uganda     |
|---------------------------------------------------------------------------------|--------------|------------|------------|
| Population <sup>1</sup>                                                         | 19.5 million | 45 million | 34 million |
| GNP per capita <sup>1</sup>                                                     | \$5485       | \$591      | \$547      |
| Epidemiologic probabilities                                                     |              |            |            |
| Prevalence of Malaria in children age < 5 <sup>2</sup>                          | 9.6%         | 4.9%       | 55.5%      |
| Inpatient case fatality rate severe malaria <sup>1</sup>                        | 0.045        | 0.031      | 0.028      |
| Inpatient case fatality rate for severe non-malaria fever illness <sup>3</sup>  | 0.054        | 0.037      | 0.035      |
| Case fatality rate for severe, untreated malaria <sup>3</sup>                   | 0.060        | 0.041      | 0.037      |
| Case fatality rate for severe, untreated non-malaria fever illness <sup>3</sup> | 0.072        | 0.049      | 0.047      |
| Behavioral probabilities                                                        |              |            |            |
| % Caregivers seek care for suspected fever <sup>2</sup>                         | .30          | .68        | .60        |
| Physician adherence to test <sup>4</sup>                                        | .40          | .82        | .51        |
| Costs <sup>5</sup> (\$)                                                         |              |            |            |
| mRDT test, distribution & storage                                               | 30.25        | 1.20       | 1.10       |
| ACT                                                                             | 12.00        | 1.10       | 1.25       |
| Inpatient treatment cost for malaria                                            | 10.00        | 1.50       | 2.00       |
| Cost per bed day                                                                | 43.17        | 3.43       | 3.39       |

Sources: <sup>1</sup>World Malaria Report, 2013 <sup>2</sup>Malaria Indicator Survey by Country <sup>3</sup>Adjusted case fatality rates from the World Malaria Report, 2013 <sup>4</sup>References in text <sup>5</sup>WHO-Choice\_cost\_estimates

**Table 2: Base Case Model Results by Country**

| Country & Strategy | Costs per Child (\$) | Incr. Costs (\$) | Deaths Averted per Child | Incr. Deaths Averted | Cost per Death Averted (\$) | Cost per Life-Year Gained (\$) |
|--------------------|----------------------|------------------|--------------------------|----------------------|-----------------------------|--------------------------------|
| Angola             |                      |                  |                          |                      |                             |                                |
| mRDT               | 68.70<br>(20.89)     | -5.02            | 0.033<br>(0.020)         | 0.003                | Cost-saving                 | Cost-saving                    |
| PT                 | 73.72<br>(22.22)     |                  | 0.030<br>(0.020)         |                      |                             |                                |
| Tanzania           |                      |                  |                          |                      |                             |                                |
| mRDT               | 12.74<br>(3.91)      | 0.93             | 0.008<br>(0.006)         | 0.006                | 155                         | 5.54                           |
| PT                 | 11.81<br>(3.47)      |                  | 0.014<br>(0.010)         |                      |                             |                                |
| Uganda             |                      |                  |                          |                      |                             |                                |
| mRDT               | 21.36<br>(5.01)      | 5.28             | 0.014<br>(0.010)         | 0.002                | 2640                        | 94.28                          |
| PT                 | 16.08<br>(3.84)      |                  | 0.016<br>(0.011)         |                      |                             |                                |

Note: Incr = Incremental.



**Table 3: List of variables, values, and sources for Model by Phillips et al. (2015)**

|                                                                | Variable                                                                    | Distribution | Base Case | Lower Limit | Upper Limit | Sources                      | Year      |
|----------------------------------------------------------------|-----------------------------------------------------------------------------|--------------|-----------|-------------|-------------|------------------------------|-----------|
| <b><i>Epidemiology</i></b>                                     |                                                                             |              |           |             |             |                              |           |
| P1                                                             | Malaria prevalence among children under 5                                   |              |           |             |             | $P1=(P2+P6-1)/(P5+P6-1)$     |           |
|                                                                | Angola                                                                      |              | 0.096     | 0.010       | 0.182       |                              |           |
|                                                                | Tanzania                                                                    |              | 0.049     | 0.010       | 0.088       |                              |           |
|                                                                | Uganda                                                                      |              | 0.555     | 0.355       | 0.755       |                              |           |
| P2                                                             | Children (< 5) with Positive mRDT results                                   |              |           |             |             |                              |           |
|                                                                | Angola                                                                      |              | 0.135     | 0.017       | 0.247       | AMIS, 2011, P51, Table 5.7   | 2011      |
|                                                                | Tanzania                                                                    |              | 0.092     | 0.000       | 0.318       | TMIS, 2011, P177, Table 11.5 | 2011      |
|                                                                | Uganda                                                                      |              | 0.549     | 0.074       | 0.801       | UMIS, 2009, P81, Table 6.3   | 2009      |
| <b><i>Diagnose</i></b>                                         |                                                                             |              |           |             |             |                              |           |
| P3                                                             | Presumptive treatment (PT) sensitivity                                      |              | 1.000     |             |             | Uzochukwu BSC et al., 2009;  |           |
| P4                                                             | Presumptive treatment (PT) specificity                                      |              | 0.000     |             |             | Shillcutt et al, 2008        |           |
| P5                                                             | mRDT sensitivity                                                            |              | 0.950     | 0.935       | 0.962       | Abba K et al, 2011           | 2011      |
| P6                                                             | mRDT specificity                                                            |              | 0.952     | 0.934       | 0.994       | Abba K et al, 2011           | 2011      |
| <b><i>Clinician adherence to diagnoses or test results</i></b> |                                                                             |              |           |             |             |                              |           |
| P7                                                             | Children (<5) diagnosed with malaria under PT strategy receive antimalarial |              | 1.000     |             |             | Assumed                      |           |
| P8                                                             | Children (<5) diagnosed with NMFI under PT strategy receive antimalarials   |              | 0.000     |             |             | Assumed                      |           |
| P9                                                             | Children (< 5) with positive mRDT results receive antimalarials             |              |           |             |             |                              |           |
|                                                                | Angola                                                                      |              | 0.941     | 0.882       | 1.000       | Rowe A.K. et al., 2009       | 2007      |
|                                                                | Tanzania                                                                    |              | 1.000     |             |             | Mubi M. et al., 2013         | 2010-2011 |
|                                                                | Uganda                                                                      |              | 0.990     |             |             | Kyabayinze et al., 2010      | 2007      |

|     |                                                                         |                      |       |       |                                                                                                                                    |               |
|-----|-------------------------------------------------------------------------|----------------------|-------|-------|------------------------------------------------------------------------------------------------------------------------------------|---------------|
| P10 | Children (< 5) with negative mRDT results receive antimalarials         |                      |       |       |                                                                                                                                    |               |
|     | Angola                                                                  | 0.600                | 0.400 | 0.800 | Rowe A.K. et al., 2009                                                                                                             | 2007          |
|     | Tanzania                                                                | 0.125                | 0.000 | 0.325 | Mubi M. et al., 2013                                                                                                               | 2010-2011     |
|     | Uganda                                                                  | 0.490                | 0.290 | 0.690 | Kyabayinze et al., 2010                                                                                                            | 2007          |
|     | <b>Drug efficacy and adherence</b>                                      |                      |       |       |                                                                                                                                    |               |
| P11 | Efficacy of ACT                                                         | 0.966                | 0.860 | 0.993 | Thwing J. et al., 2011                                                                                                             |               |
| P13 | Efficacy of antibiotics                                                 | 0.750                | 0.600 | 0.900 | Shillcutt et al, 2008                                                                                                              |               |
| P15 | Efficacy of pre-referral treatment (rectal artesunate)                  | 0.490                | 0.193 | 0.678 | Tozan Y. et al., 2010                                                                                                              |               |
| P16 | Severe malaria children are referred with pre-referral treatment        |                      |       |       |                                                                                                                                    |               |
|     | Angola                                                                  | 0.100                | 0.000 | 0.200 | PMI MOP 2011, 12, 13                                                                                                               |               |
|     | Tanzania                                                                | 0.750                | 0.550 | 0.950 | PMI MOP 2011, 12, 13                                                                                                               |               |
|     | Uganda                                                                  | 0.600                | 0.400 | 0.800 | PMI MOP 2011, 12, 13                                                                                                               |               |
|     | <b>Treatment seeking patterns</b>                                       |                      |       |       |                                                                                                                                    |               |
| P17 | Patients (under 5 years old) seek care                                  |                      |       |       |                                                                                                                                    |               |
|     | Angola                                                                  | 0.298                | 0.098 | 0.498 | Angola MIS data, Table 4.7 DHS report 2011                                                                                         | 2011          |
|     | Tanzania                                                                | 0.680                | 0.480 | 0.880 | Tanzania MIS data, Table 11.1 DHS report                                                                                           | 2006/7 & 2012 |
|     | Uganda                                                                  | 0.594                | 0.394 | 0.794 | Uganda MIS data, Table 4.1, DHS report                                                                                             | 2009          |
| P18 | Among those seeking care, the probability that patients go to hospitals | 0.367                | 0.094 | 0.774 | UMIS                                                                                                                               |               |
| P19 | Severe malaria children (<5) get inpatient care                         |                      |       |       |                                                                                                                                    |               |
|     | Angola                                                                  | 0.122                | 0.001 | 0.244 | Recommendation: increase the all age rate from WHO by 20% for base rate; use adult value as lower & Brent (2006) as higher bounds. |               |
|     | Tanzania                                                                | 0.147                | 0.001 | 0.294 |                                                                                                                                    |               |
|     | Uganda                                                                  | 0.133                | 0.001 | 0.264 |                                                                                                                                    |               |
| P20 | Severe NMFI children (<5) get inpatient care                            | P20=P19              |       |       |                                                                                                                                    |               |
|     | <b>Disease progression</b>                                              |                      |       |       |                                                                                                                                    |               |
| P23 | Transition to fever in cycle length t                                   | ProbToProb(P31;t/14) |       |       |                                                                                                                                    |               |

|     |                                                                                                                                         |                 |                       |                       |                                                                                 |
|-----|-----------------------------------------------------------------------------------------------------------------------------------------|-----------------|-----------------------|-----------------------|---------------------------------------------------------------------------------|
| P24 | For patients who did not seek care at first, their disease progress to severe conditions. The probability of care-seeking at that time. | 0.000           |                       |                       | Structural assumption                                                           |
| P25 | Malaria not effectively treated lead to severe conditions (Age < 5)                                                                     | 0.050           | 0.001                 | 0.099                 | Lubell                                                                          |
| P26 | NMFI not effectively treated lead to severe conditions (Age < 5)                                                                        | P26 = RR1 * P25 |                       |                       |                                                                                 |
| P27 | CFR for <b>severe</b> malaria children, inpatient care                                                                                  |                 |                       |                       |                                                                                 |
|     | Angola                                                                                                                                  | 0.045           | 0.001                 | 0.089                 | Use multiplier 1.20 of adult value; adults seek hosp care, so not so different. |
|     | Tanzania                                                                                                                                | 0.031           | 0.001                 | 0.061                 |                                                                                 |
|     | Uganda                                                                                                                                  | 0.028           | 0.001                 | 0.055                 |                                                                                 |
| P28 | CFR for <b>severe</b> malaria children, without formal care                                                                             | P28 = RR2 * P27 |                       |                       |                                                                                 |
| P29 | CFR for <b>severe</b> NMFI children, inpatient care                                                                                     | P29 = RR1 * P27 |                       |                       |                                                                                 |
| P30 | CFR for <b>severe</b> NMFI children, without formal care                                                                                | P30 = RR2 * P29 |                       |                       |                                                                                 |
| P31 | Transition to fever in two weeks                                                                                                        |                 |                       |                       |                                                                                 |
|     | Angola                                                                                                                                  | 0.341           | <a href="#">0.250</a> | <a href="#">0.457</a> | MIS, 2011                                                                       |
|     | Tanzania                                                                                                                                | 0.204           | <a href="#">0.071</a> | <a href="#">0.338</a> | MIS, 2011                                                                       |
|     | Uganda                                                                                                                                  | 0.447           | <a href="#">0.223</a> | <a href="#">0.661</a> | MIS, 2009                                                                       |
| T   | cycle length (days)                                                                                                                     | 30              | 14                    | 30                    |                                                                                 |
| RR1 | Relative risk (general) comparing NMFI to malaria                                                                                       | 1.2             | 1.05                  | 1.35                  | Assumed NMFI values 20% higher than those for malaria;                          |
| RR2 | Relative risk of CFR comparing no formal care with inpatient care                                                                       | 1.33            | 1.28                  | 1.38                  |                                                                                 |

Assumed informal care values 33% higher than those for malaria and NMFI respectively

## COST DETAILS

|     | Variable                                        | Base Case | Lower Limit | Upper Limit | Cost Adjustments                                                                                                | Source                                                                                                                           |
|-----|-------------------------------------------------|-----------|-------------|-------------|-----------------------------------------------------------------------------------------------------------------|----------------------------------------------------------------------------------------------------------------------------------|
|     | <b>Test Cost</b>                                |           |             |             |                                                                                                                 |                                                                                                                                  |
| C1  | mRDT Costs                                      |           |             |             |                                                                                                                 |                                                                                                                                  |
|     | Angola                                          | 3.25      | 2.00        | 4.50        |                                                                                                                 | Angola NMCP                                                                                                                      |
|     | Tanzania                                        | 1.20      | 0.45        | 1.50        |                                                                                                                 | Tanzania NMCP                                                                                                                    |
|     | Uganda                                          | 1.10      | 0.60        | 1.50        |                                                                                                                 | Uganda NMCP                                                                                                                      |
|     | <b>Outpatient Cost</b>                          |           |             |             |                                                                                                                 |                                                                                                                                  |
| C2  | ACT cost                                        |           |             |             |                                                                                                                 |                                                                                                                                  |
|     | Angola                                          | 12.00     | 9.00        | 15.00       |                                                                                                                 | Angola's MoH/NMCP                                                                                                                |
|     | Tanzania                                        | 1.10      | 0.80        | 1.25        |                                                                                                                 | Tanzania's MoH/NMCP                                                                                                              |
|     | Uganda                                          | 1.25      | 0.95        | 1.50        |                                                                                                                 | Uganda's MoH/NMCP                                                                                                                |
| C3  | Cost of other antimalarials                     |           |             |             |                                                                                                                 |                                                                                                                                  |
|     | Angola                                          | 6.5       | 3           | 10          |                                                                                                                 | Angola's MoH/NMCP                                                                                                                |
|     | Tanzania                                        | 1         | 0.5         | 1.5         |                                                                                                                 | Tanzania's MoH/NMCP                                                                                                              |
|     | Uganda                                          | 1.35      | 0.7         | 2           |                                                                                                                 | Uganda's MoH/NMCP                                                                                                                |
| C4  | Cost of antibiotics                             |           |             |             |                                                                                                                 |                                                                                                                                  |
|     | Angola                                          | 6.75      | 5.00        | 8.50        |                                                                                                                 | Angola's MoH/NMCP                                                                                                                |
|     | Tanzania                                        | 1.35      | 0.75        | 2.00        |                                                                                                                 | Tanzania's MoH/NMCP                                                                                                              |
|     | Uganda                                          | 1.50      | 0.80        | 2.20        |                                                                                                                 | Uganda's MoH/NMCP                                                                                                                |
| C21 | Cost per outpatient visit                       |           |             |             | Calculated the weighted average from the urban and rural population size. Then conduct adjustment (see C21 tab) |                                                                                                                                  |
|     | Angola                                          | 6.24      | 4.99        | 7.10        |                                                                                                                 | WHO-CHOICEunit_cost_estimates >> 2. User Defined Parameters >> 2008 >> Public. Used the cost for health facilities with no beds. |
|     | Tanzania                                        | 0.50      | 0.45        | 0.64        |                                                                                                                 |                                                                                                                                  |
|     | Uganda                                          | 0.47      | 0.45        | 0.64        |                                                                                                                 |                                                                                                                                  |
|     | <b>Inpatient Cost</b>                           |           |             |             |                                                                                                                 |                                                                                                                                  |
| C5  | Pre-referral treatment cost (rectal artesunate) | 0.41      | 0.33        | 0.50        | Adjusted for discount at 3% rate in the original paper.                                                         | Tozan Y. et al., 2010                                                                                                            |

|     |                                          |                |       |       |                                                                                                                                    |                                                                                                                                                                     |
|-----|------------------------------------------|----------------|-------|-------|------------------------------------------------------------------------------------------------------------------------------------|---------------------------------------------------------------------------------------------------------------------------------------------------------------------|
| C9  | Inpatient treatment cost for malaria     |                |       |       |                                                                                                                                    |                                                                                                                                                                     |
|     | Angola                                   | 10             | 7     | 13    |                                                                                                                                    | Angola's MoH/NMCP                                                                                                                                                   |
|     | Tanzania                                 | 1.5            | 1.05  | 1.95  |                                                                                                                                    | Tanzania's MoH/NMCP                                                                                                                                                 |
|     | Uganda                                   | 2              | 1.4   | 2.6   |                                                                                                                                    | Uganda's MoH/NMCP                                                                                                                                                   |
| C15 | Inpatient treatment cost for NMFI        |                |       |       |                                                                                                                                    |                                                                                                                                                                     |
|     | Angola                                   | 8.5            | 5.95  | 11.1  |                                                                                                                                    | Angola's MoH/NMCP                                                                                                                                                   |
|     | Tanzania                                 | 2              | 1.4   | 2.6   |                                                                                                                                    | Tanzania's MoH/NMCP                                                                                                                                                 |
|     | Uganda                                   | 2.2            | 1.54  | 2.86  |                                                                                                                                    | Uganda's MoH/NMCP                                                                                                                                                   |
| C18 | Hospital bed day cost for severe malaria | C20*t4_Malaria |       |       |                                                                                                                                    |                                                                                                                                                                     |
| C19 | Hospital bed day cost for severe NMFI    | C20*t4_NMFI    |       |       |                                                                                                                                    |                                                                                                                                                                     |
| C20 | Cost per bed day                         |                |       |       | First adjusted for inflation from 2008 to 2010 in LCU. Then adjust for exchange rate to 2010 USD. See spreadsheet C20 for details. | WHO-CHOICEunit_cost_estimates >> 2. User Defined Parameters >> 2008 >> Public. The secondary-level hospital is used as base case. The other two are used as ranges. |
|     | Angola                                   | 43.17          | 41.38 | 55.82 |                                                                                                                                    |                                                                                                                                                                     |
|     | Tanzania                                 | 3.43           | 3.28  | 4.43  |                                                                                                                                    |                                                                                                                                                                     |
|     | Uganda                                   | 3.39           | 3.25  | 4.38  |                                                                                                                                    |                                                                                                                                                                     |

**Note: All costs in this table now are in 2010 USD**
